# Supplementary material
Source: PubMed Central journal article supplement (PMC2922612)
Supplement: 0914582107_pnas.0914582107_SI.pdf [file 0914582107_pnas.0914582107_SI.pdf]

# Supporting Information

Howes et al. 10.1073/pnas.0914582107

## SI Text

**A. Shear Strength Measurement.** The field-vane shear strength measurement often overestimates soil strength (1). Shear measurements are influenced by strain rate and anisotropy within the soil. The strain rate is controlled by the rotation rate and the diameter of the vane. Lower strain rates allow more time for the soil to slide, deform, and creep, resulting in lower values of peak strength, while more rapid strain rates result in a higher apparent strength. Clays often display anisotropy and are stronger in the vertical plane than the horizontal plane due to incremental sedimentation and the existence of laminations (2). During the field test, 80% of the shear occurs in the vertical plane. A correction factor has been proposed by Bjerrum to reduce the field-vane strength estimates based on the plasticity index of the soil (1); however, it was not possible to apply this correction to our data. An additional consideration should be the effect of friction between the instrument rod and soil, which adds to the apparent strength of soil and is difficult to consistently quantify and thus correct for. No adjustments were made to the field-vane data, since it was felt that this would increase the uncertainties. The field-vane values should therefore be considered conservative and are likely overestimates of strength.

To further quantify the low shear strength layer observed in the low salinity wetland, laboratory vane measurements were made on the undisturbed half cores that were collected in the field. In this test the shearing occurs in both the horizontal plane and vertical planes, such that an average strength is obtained. It also eliminates the effect of rod friction. The lab vane is smaller in diameter (12.7 mm × 12.7 mm) and is less likely to contact rooting, and thus isolates the strength of the soil matrix itself. One limitation of the test is that the soils have to be removed from the field, which decreases the effective stress and can result in a slight rearrangement of soil particles, reducing soil strength.

**B. Wave Shear Stress Calculations.** The presence of vegetation within a flow field decreases near bed velocity. Within the canopy, the obstruction by the plant stems and leaves increases turbulence, dramatically decreasing the average flow speeds, damping wave motion and thus reducing the potential for erosion by the resuspension of particles (3–7). This sudden reduction in velocity can also force the settling of suspended particles and actually increase sedimentation (8, 9). Deceleration is correlated to vegetation density (4, 9). The movement of rooting at a marsh platform edge has been seen to dislodge grains in small waves (10); however, herein we consider a broader scale.

When vegetation is fully submerged (as occurred during the storm surge associated with Katrina), while flow through the canopy is reduced, an accelerated skimming flow develops above the canopy. The skimming flow displays a logarithmic velocity profile, beneath which the vegetation may be considered as a form of macro-roughness (6). For a review of the impact of vegetation on flow the reader is referred to Neumeier (2007).

Several studies have assessed the impact of vegetation in terms of the roughness length ( $Z_0$ ) that they impart onto the flow (5–7). These studies consider *Spartina maritima* and *Spartina anglica* (Table S2), and although no estimates of  $Z_0$  for *Spartina alterniflora* have been published, Leonard and Croft (2006) publish

measurements of turbulent kinetic energy (TKE) within flows over a submerged stand of *Sp. alterniflora* 30 cm in height. This vegetation had been artificially shortened to a height lower than the depth of the water column in order to examine their impact on supernatant flow. These data have been used herein to estimate a  $Z_0$  for *Sp. alterniflora*, using relationships between TKE and near bed shear stress  $\tau$  (Eq. S1) (11–13), and then rearranging the von Karman-Prandtl relationship (Eq. S2) to provide an estimate of roughness length from this  $\tau$  (Eqs. S1 and S2):

$$\tau = \rho u_*^2 \quad [\text{S1}]$$

$$u = \frac{u_*}{\kappa} \ln\left(\frac{z}{z_0}\right) \quad [\text{S2}]$$

These results are shown in Table S2. The roughness length ( $Z_0$ ) of the vegetation depends only on the vegetation characteristics (stem diameter, vegetation density and height), and is not sensitive to the current velocity or the water depth (5).

Klopstra et al (1997) used an analytical modeling approach to derive a  $Z_0$  for varying vegetation characteristics, finding values of between 22 and 46 cm for submerged vegetation of between 0.5 and 2 m height in water depths of 5 m (14). Given that no data exist for *Spartina patens*, which is generally shorter (~30–50 cm) but denser than *Sp. alterniflora*, we will use estimates for the *Sp. alterniflora* to represent this vegetation at our lowest limit of roughness ( $Z_0 = 17$  cm; this is a conservative estimate as a higher roughness is expected with increased vegetation density). As the both the *Sp. patens* and *Sp. alterniflora* will likely have been at their tallest late in summer higher roughness ( $Z_0 = 30$  cm) was also considered obtained by averaging the modeling results for the taller plants (14).

The wave friction factor ( $f_w$ ) can be related empirically to the ratio of the amplitude of the orbital excursion to the bed roughness (11).  $Z_0$  has been shown to be equivalent for both current and wave conditions (15), thus the estimates of  $Z_0$  discussed above can be used within Eq. S4 to provide  $f_w$ . This friction factor can then be used to relate shear stress ( $\tau_w$ ) to the maximum near bed orbital velocity of the wave during a wave period ( $u_{w,m}$ ; Eq. S3 and S4).

$$\tau_w = \frac{1}{2} \rho f_w u_{w,m}^2 \quad [\text{S3}]$$

where

$$f_w = 1.39 \left(\frac{A}{z_0}\right)^{-0.52} \quad [\text{S4}]$$

where  $A$  is the near bed orbital amplitude of the wave (11). Calculations were made using the estimates of wave height, period and water depth extracted from the STWAVE-ADCIRC modeling of Hurricane Katrina.

In order to consider the most extreme conditions both the significant and maximum wave heights ( $1.868H_s$ ) were used in calculations of  $A$  and thus shear stresses for each of these conditions, for  $Z_0 = 17$  cm and  $Z_0 = 30$  cm were determined at each of the 7 sites for which model data were extracted (Fig. S1).

1. Bjerrum L (1972) Embankments on soft ground. *Proc ASCE Specialty Conf Performance of Earth and Earth Supported Structures* (Purdue Univ, Lafayette, IN) pp 1–54.  
2. Day RW (2001) *Soil Testing Manual* (McGraw-Hill, New York).

3. Moeller I, Spencer T, French JR (1996) Wind wave attenuation over saltmarsh surfaces: Preliminary results from Norfolk, England. *J Coastal Res* 12:1009–1016.  
4. Augustin LN, Irish JL, Lynett P (2009) Laboratory and numerical studies of wave damping by emergent and near-emergent wetland vegetation. *Coast Eng* 56:332–340.

5. Neumeier U (2007) Velocity and turbulence variations at the edge of salt marshes. *Cont Shelf Res* 27:1046–1059.
6. Neumeier U, Amos CL (2006) The influence of vegetation on turbulence and flow velocities in European salt marshes. *Sedimentology* 53:259–277.
7. Neumeier U, Ciavola P (2004) Flow resistance and associated sedimentary processes in a *Spartina maritime* salt marsh. *J Coast Res* 20:435–447.
8. Reed DJ, Spencer T, Murray AL, French JR (1999) Marsh surface sediment deposition and the role of tidal creeks: Implications for created and managed coastal marshes. *J Coast Conservat* 5:81–90.
9. Ghisalberti M, Nepf H (2006) The structure of the shear layer over rigid and flexible canopies. *Environ Fluid Mech* 6:277–301 DOI: 10.1007/s10652-006-0002-4.
10. Feagin RA et al. (2009) Does vegetation prevent wave erosion of salt marsh edges? *Proc Natl Acad Sci USA* 106:10109–10113.
11. Soulsby RL (???) *Dynamics of Marine Sands, a Manual for Practical Applications* (Thomas, Telford, UK), p 250.
12. Soulsby RL, Humphery JD (1990) In *Water Wave Kinematics; Proc. of the NATO Advanced Res. Workshop on Water Wave Kinematics, Molde, Norway, 22–25 May 1989*, eds Torum A, Gudmestad OT (Kluwer Academic Publishers, Dordrecht), pp 413–428.
13. Stapleton KR, Huntley DA (1995) Seabed stress determination using the inertial dissipation method and the turbulent kinetic energy method. *Earth Surf Proc Land* 20:807–815.
14. Klopstra D, Barneveld HJ, van Noorwijk JM, van Velzen EH (1997) Analytical model for hydraulic roughness of submerged vegetation. *Proceedings of the 27th Congress of the International Association for Hydraulic Research, San Francisco* (Am Society of Civil Engineers, New York), pp 775–780.
15. Mathisen PP, Madsen OS (1996) Waves and currents over a fixed rippled bed. 1. Bottom roughness experienced by waves in the presence and absence of currents. *J Geophys Res* 101:16533–16542.

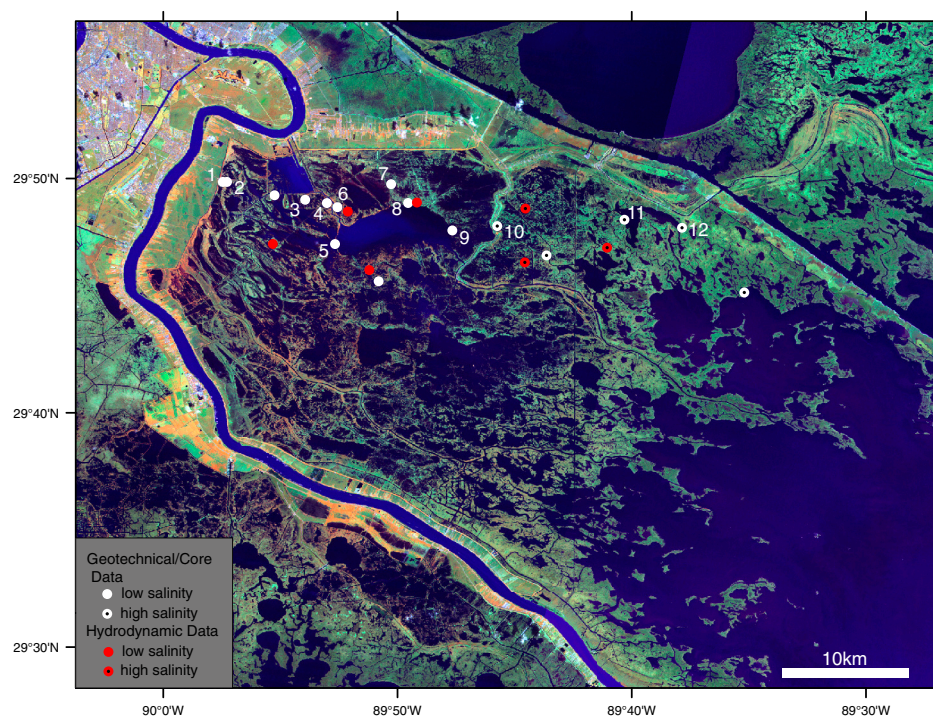

**Fig. S1.** Showing the positions at which model data were extracted and wave shear stress calculations were undertaken (red circles). Also showing sites of geotechnical measurements in the field (all white circles) and coring sites for geotechnical measurements in the laboratory (numbered white circles). Low and high salinity sites are differentiated using a black dot.



**Table S1. Environmental characteristics of the wetland categories**

|                                                                                                    | Fresh                                                                                                                                          | Intermediate                                                                                                                                                                                 | Brackish                                                                                                                                       | Saline                                                                                                                                       |
|----------------------------------------------------------------------------------------------------|------------------------------------------------------------------------------------------------------------------------------------------------|----------------------------------------------------------------------------------------------------------------------------------------------------------------------------------------------|------------------------------------------------------------------------------------------------------------------------------------------------|----------------------------------------------------------------------------------------------------------------------------------------------|
| Vegetation                                                                                         | <b><i>Sagittaria sp.</i>, <i>Panicum hemitomon</i>, <i>Hydrocotyle sp.</i>, <i>Pontederia cordata</i>, <i>Althernantera philoceroides</i>.</b> | <b><i>Sagittaria sp.</i>, <i>Spartina patens</i>, <i>Vigna luteola</i>, <i>Scirpus californicus</i>, <i>Echinochloa walteri</i>, <i>Cladium jamaicense</i>, <i>Phragmites australis</i>.</b> | <b><i>Spartina patens</i>, <i>Spartina alterniflora</i>, <i>Scirpus americanus</i>, <i>Scirpus robustus</i> and <i>Eleocharis parvula</i>.</b> | <b><i>Spartina alterniflora</i>, <i>Juncus roemerianus</i>, <i>Batis maritima</i>, <i>Avicennia germinans</i>, <i>Distichlis spicata</i></b> |
| Mean salinity (ppt)                                                                                | 0                                                                                                                                              | 4                                                                                                                                                                                            | 10                                                                                                                                             | 18                                                                                                                                           |
| Salinity range (ppt)                                                                               | 0–3                                                                                                                                            | 2–8                                                                                                                                                                                          | 4–18                                                                                                                                           | 8–29                                                                                                                                         |
| Equivalent salinity classification                                                                 | Limnetic (0–0.5 ppt)                                                                                                                           | Oligohaline (0.5–5 ppt)                                                                                                                                                                      | Mesohaline (5–18 ppt)                                                                                                                          | Polyhaline (18–30 ppt)                                                                                                                       |
| <b>Further description based on 2008–2009 observational data from monitored sites in each zone</b> |                                                                                                                                                |                                                                                                                                                                                              |                                                                                                                                                |                                                                                                                                              |
| Sites (N)                                                                                          | 2                                                                                                                                              | 8                                                                                                                                                                                            | 4                                                                                                                                              | 1                                                                                                                                            |
| Mean marsh elev. NAVD88 (m)                                                                        | 0.357                                                                                                                                          | 0.372                                                                                                                                                                                        | 0.259                                                                                                                                          | 0.265                                                                                                                                        |
| Average percentage of time inundated                                                               | 41.7                                                                                                                                           | 25.2                                                                                                                                                                                         | 36.7                                                                                                                                           | 42.02                                                                                                                                        |
| Mean water elev. NAVD88 (m)                                                                        | 0.405                                                                                                                                          | 0.311                                                                                                                                                                                        | 0.247                                                                                                                                          | 0.198                                                                                                                                        |
| Average number of species observed                                                                 | 26                                                                                                                                             | 16                                                                                                                                                                                           | 12                                                                                                                                             | 2                                                                                                                                            |

The first half of the table presents general conditions for the vegetation zones used in this study based upon observations by Visser et al. (1998) and Linscombe and Charbreck (2001). Dominant vegetation types in each zone are bolded. The second portion of the table presents average conditions determined from 1–2 years of in situ measurements collected at permanent monitoring stations within Breton Sound. Data were extracted for individual stations using [http://www.lacoast.gov/crms\\_viewer/](http://www.lacoast.gov/crms_viewer/), and averaged in Excel.

**Table S2. Values of  $Z_0$  from field measurements**

| Study                     | Vegetation Type                           | Vegetation Height | $Z_0$        |
|---------------------------|-------------------------------------------|-------------------|--------------|
| Neumeier & Ciavola (2004) | <i>Spartina maritima</i>                  | 20–35 cm          | 13.2–18.1 cm |
| Neumeier & Amos (2006)    | <i>Spartina maritima</i> & <i>anglica</i> | 19–34 cm          | 11–23.9 cm   |
| Leonard & Croft (2006)    | <i>Spartina alterniflora</i>              | 30 cm *           | 20 cm †      |
| Neumeier (2007)           | <i>Spartina anglica</i>                   | 15–24.5 cm        | 9.9–20.9     |

\*Vegetation cut in order to produce a submerged condition.

† $Z_0$  not calculated by the study but estimated here using the given TKE data.
